# Supplementary material
Source: PubMed Central journal article supplement (PMC3723394)
Supplement: NIHMS416680-supplement-1.pdf [file NIHMS416680-supplement-1.pdf]

## Supplementary Figure 1

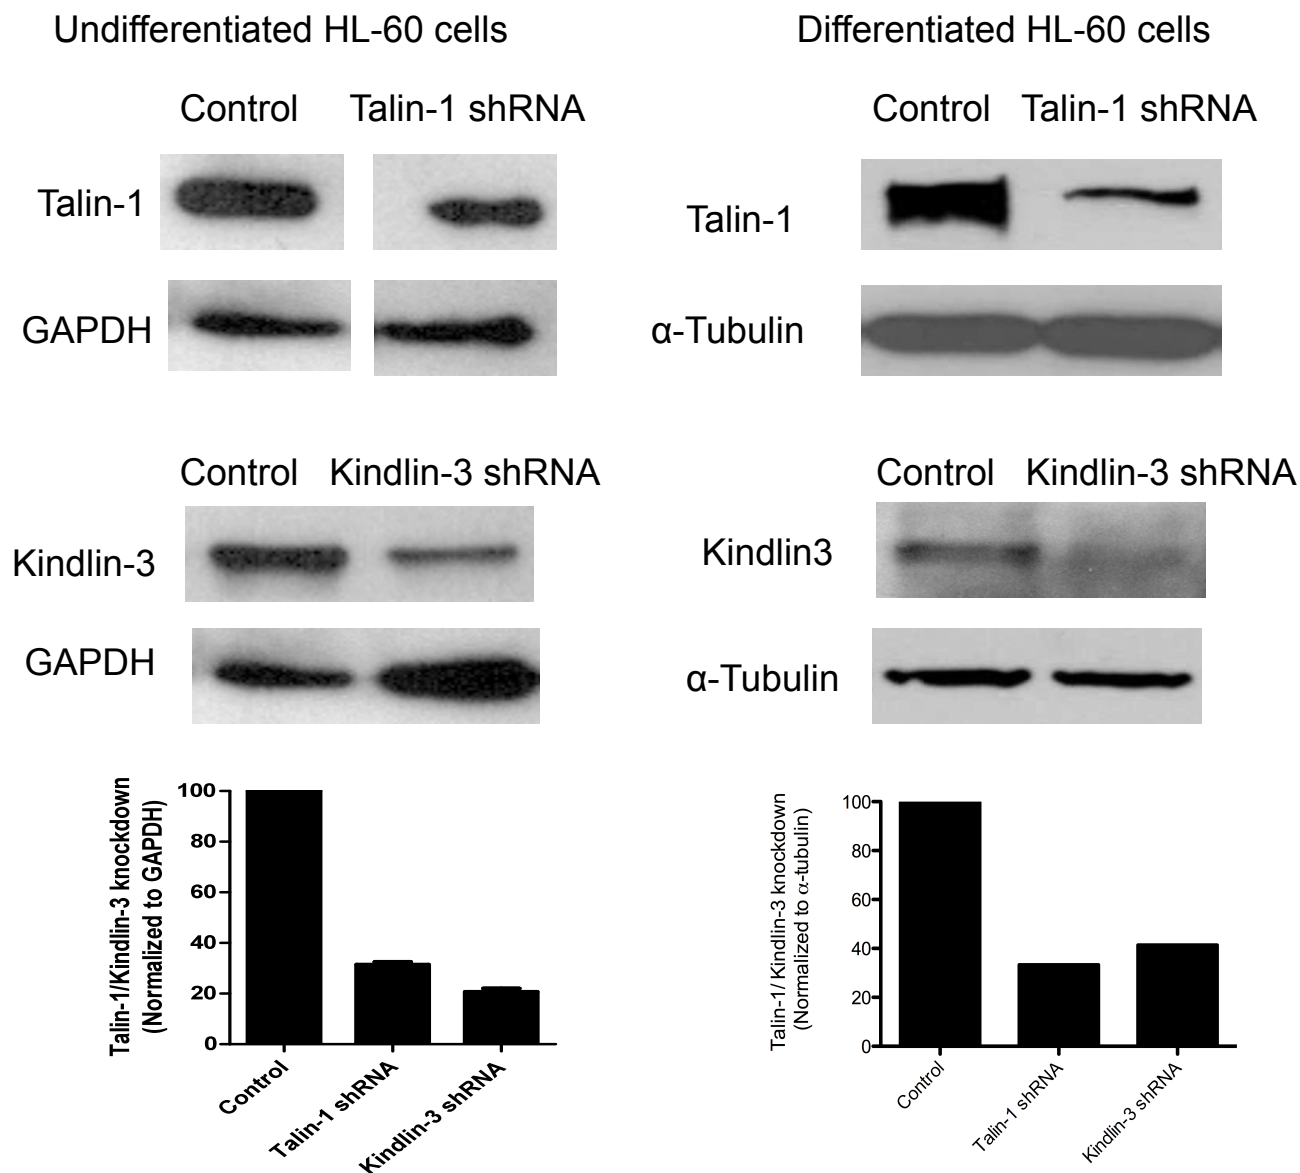

**Supplementary figure 1: *Talin-1* and *Kindlin-3* knockdown by lentiviral transfection of shRNA in HL-60 cells.** Control, *Talin-1* and *Kindlin-3* shRNA transfected cells were lysed before and after differentiation with 1.3% DMSO, 1mg protein lysate was run on SDS page and *Talin-1* and *Kindlin-3* protein was detected by western blot. *Talin-1* and *Kindlin-3* protein expression was normalized to GAPDH expression and revealed a 70% and 80% knockdown respectively. For blot images of *Talin-1* knockdown in *Talin-1* shRNA cells, the two blots are from the same lane.

## Supplementary Figure 2

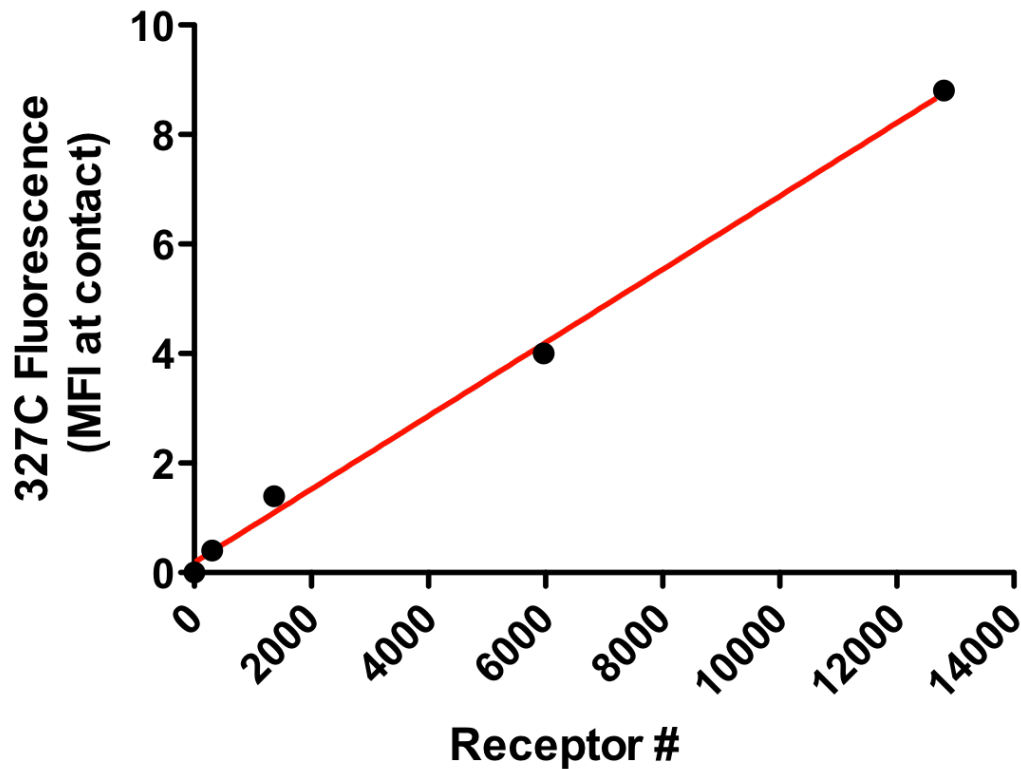

**Supplementary Figure 2:** *Correlating 327C MFI with antibody binding sites on beads at the contact site.* 7.65  $\mu\text{m}$  beads with increasing antibody binding sites were incubated with 327C mAb-Alexa-488 for 30 minutes and allowed to settle on a glass substrate. 327C fluorescence was imaged by TIRF at settings equivalent to other experiments measuring 327C expression and mean fluorescence intensity was quantified for each bead condition. 327C MFI at contact was plotted against average receptor numbers at contact site to obtain a linear relationship.

## Supplementary Figure 3

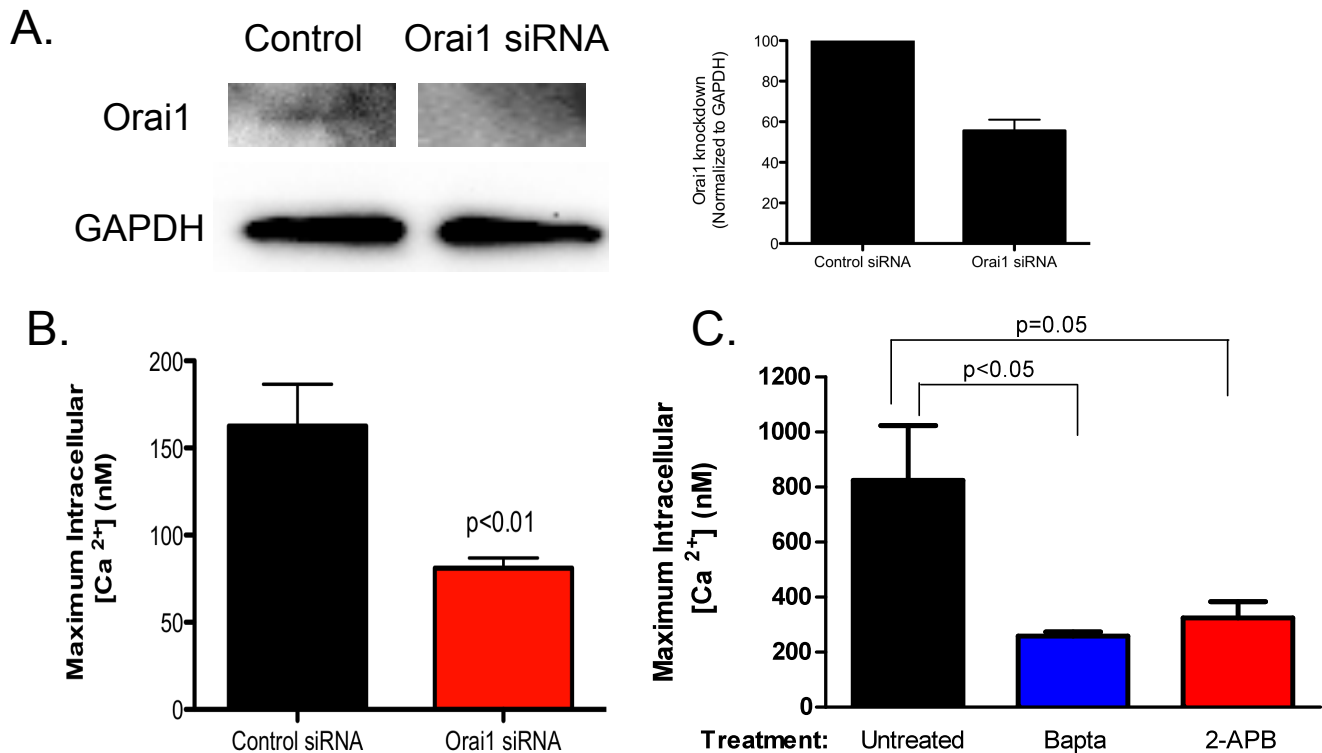

**Supplementary Figure 3** *Orai1* knockdown, *Bapta* and *2-APB* effectively inhibit intracellular calcium. A. HL-60 cells transfected with control or *Orai1* siRNA and differentiated over 3 days with 1.3% DMSO were lysed and 1mg protein lysate was run on SDS page and *Orai1* protein was detected by western blot. *Orai1* protein expression was normalized to GAPDH expression and revealed a 50% knockdown. For blot images of *Orai1* knockdown the two blots are from the same lane. B and C. PMN were isolated from whole blood or HL-60 cells were transfected with control and *Orai1* siRNA and differentiated to form neutrophil like cells. Cells were labeled with Fura-2AM, PMN were treated with 50uM *Bapta* and 100uM *2-APB* and all cells were perfused over an ICAM-1+240Q substrate and intracellular calcium flux was measured over 2 minutes. To ensure LFA-1 dependent adhesion, cells were pretreated with anti-Mac-1 mAb ICRF44. Maximum calcium levels were plotted and data shown is mean $\pm$  SEM from 3 independent experiments.

## Supplementary Figure 4

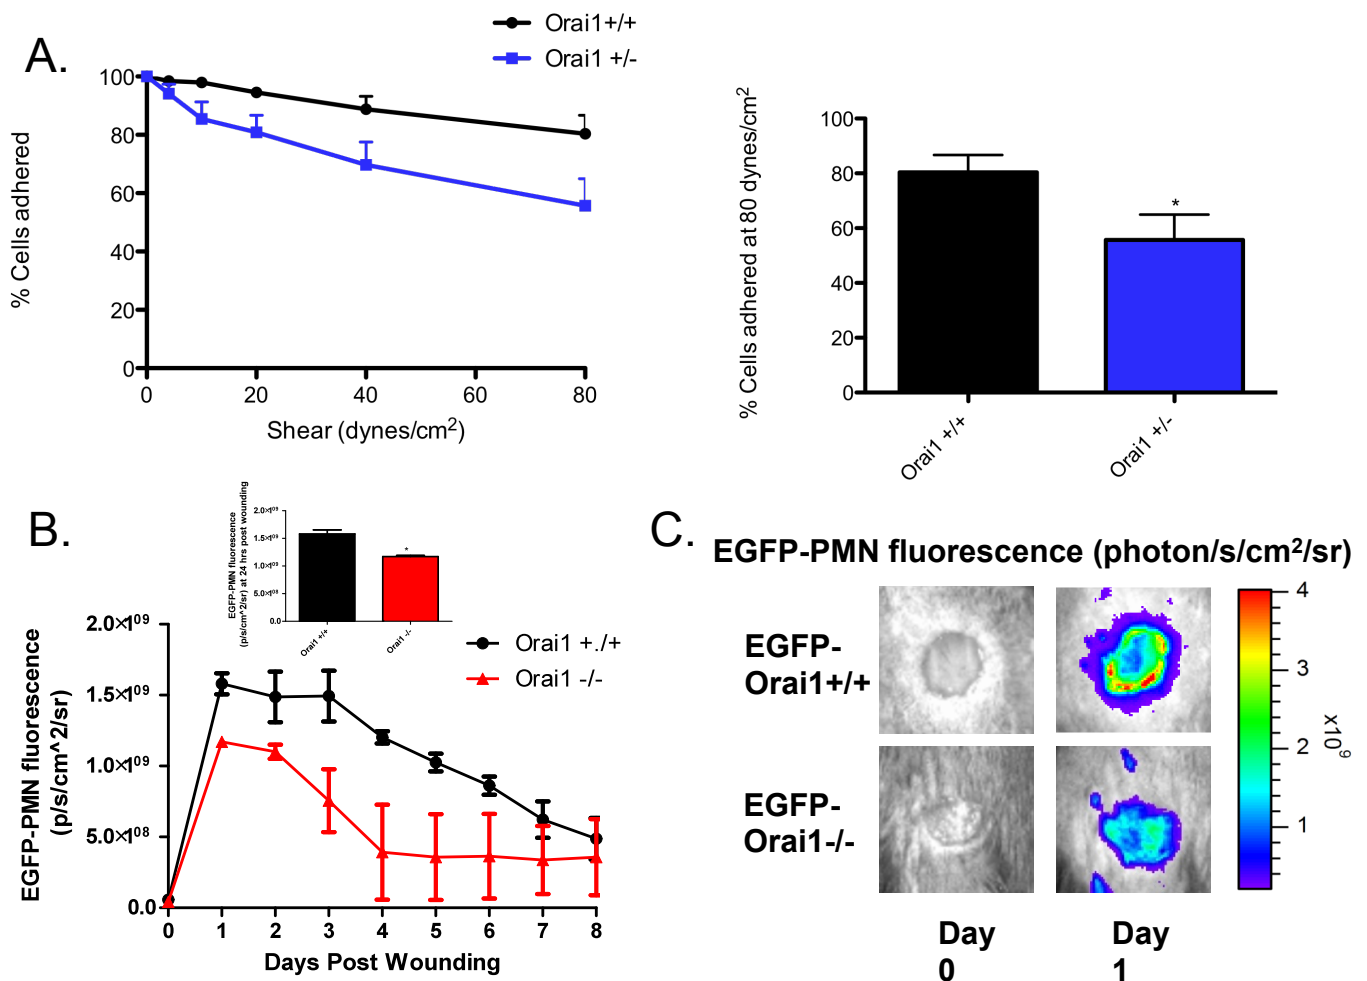

**Supplementary Figure 4: *Orai1* is required for PMN adhesion strengthening and migration to wound sites.** A. Bone marrow neutrophils were isolated from Orai1<sup>+/+</sup> and Orai1<sup>+/-</sup> mice, activated with Mn<sup>2+</sup> and allowed to settle over an ICAM-1 coated substrate. Shear was ramped from 0, 4, 10, 20, 40, 80 dynes/cm<sup>2</sup> at 30 second intervals and number of cells remaining bound were counted and plotted. To ensure LFA-1 dependent adhesion, cells were pretreated with anti-Mac-1 M1/70 for all experiments. B and C. Skin wounds were created on the backs of EGFP-Orai1<sup>+/+</sup> and EGFP-Orai1<sup>-/-</sup> mice and EGFP neutrophil fluorescence in the wound was tracked over 8 days. Representative images at Day 0 and 1 are shown. Data is plotted as mean ± SEM from n=3 experiments.
